# Supplementary material for: Atco, a yeast mitochondrial complex of Atp9 and Cox6, is an assembly intermediate of the ATP synthase
Source: PubMed Central journal article supplement (PMC7228087; doi:10.1371/journal.pone.0233177), 2020-05-15
Supplement: pone.0233177.s001.pdf [file pone.0233177.s001.pdf]

# \* نینینا

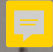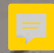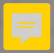

۱-۲-۳

۱  
۱  
۱  
۱  
۱  
۱  
۱

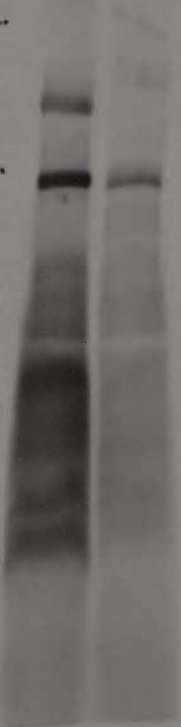

۱

۱

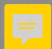

EX ✓  
Ni ✓  
EL  
PC  
EL

0 30 60 0 30 60 0 30 60

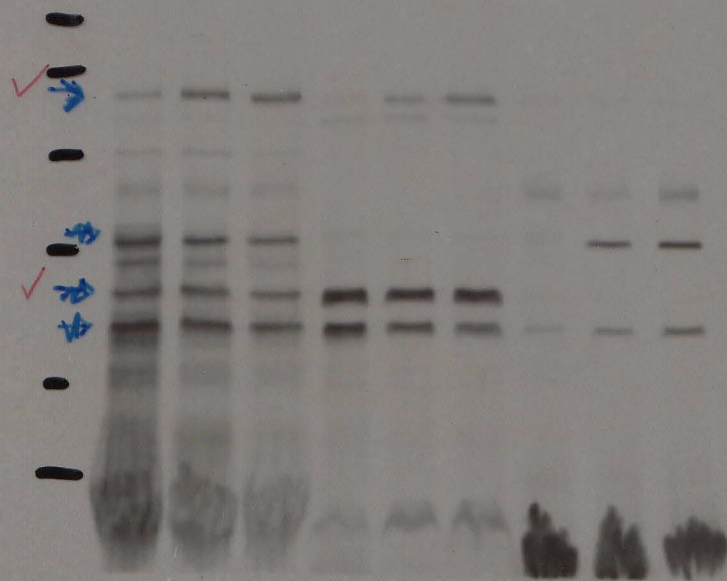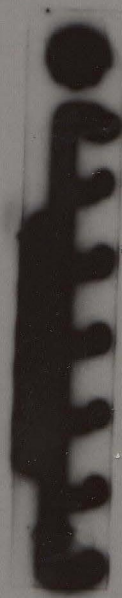

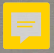

Ni  
0' 30' 60'

PC  
0' 30' 60'

T

<

<

<

L

↑

↑

↑

↑

L

06/04/2018

DIHMM4 MAR 19:02 0 052001570151000

0/N exposure

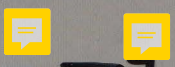

N/0

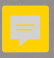

L

N 30

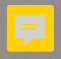

0/N.

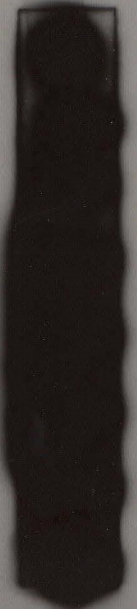

L

12

Handwritten text on the right edge: *Handwritten text, possibly a date or reference number.*

3/05/2019

┌      +      +      └

┌      T      T      └

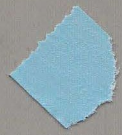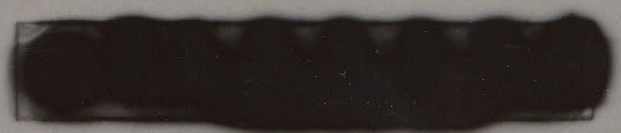

3 days.

(13)

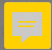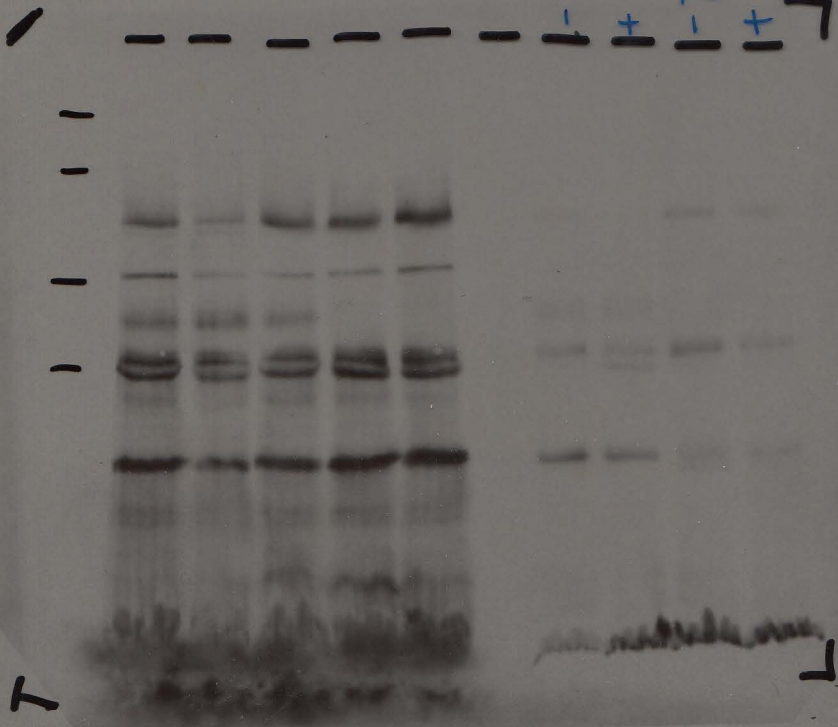

10302  
COX6-IIIc  
- +  
10302  
AN5551  
COX6-IIIc  
- +

2 day exposure.

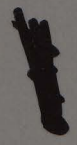

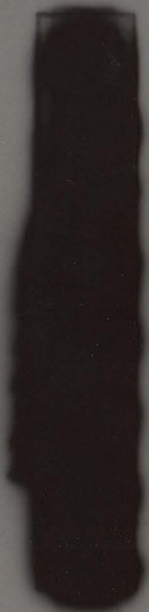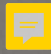

aw303

w303/cor6-fnc  
-CAP

+CAP

w303  $\Delta$ msi5/  
cor6-fnc  
-CAP

+CAP

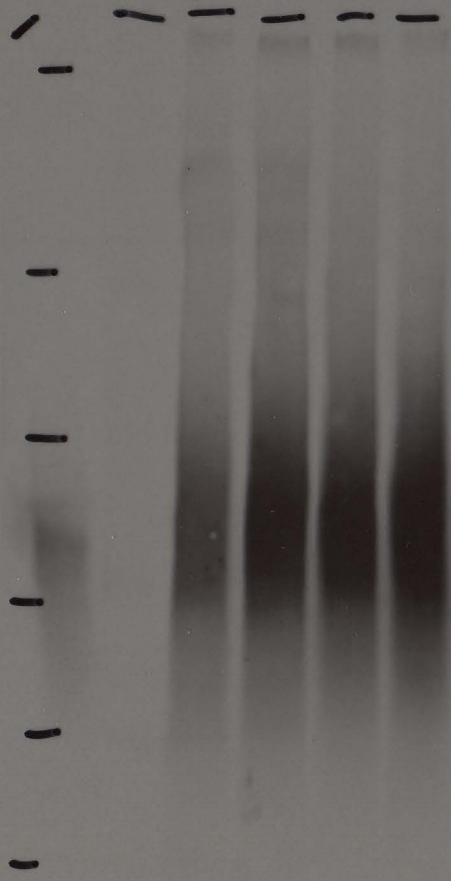

N/A.

T

T

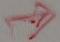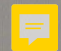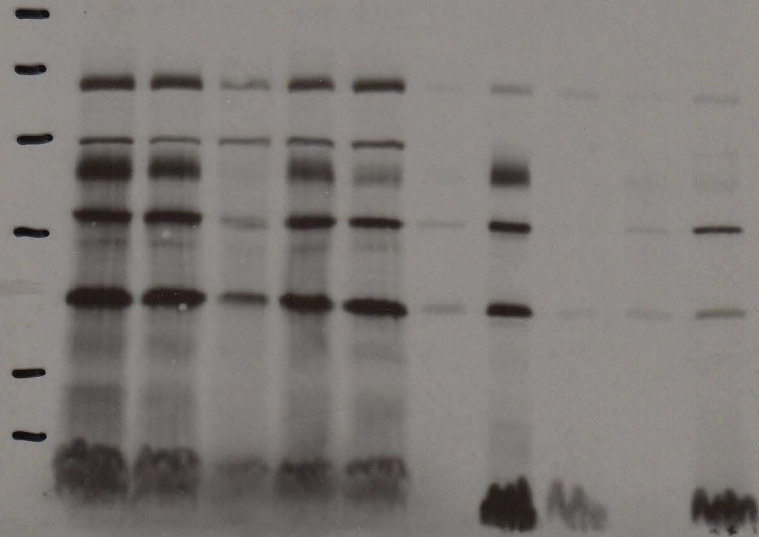

W303

W303 / COX6-MAZ

W303  $\Delta$ oxal / COX6-MAZ

W303  $\Delta$ oxal / STG

W303  $\Delta$  COX5 /

COX6-MAZ.

(7)



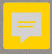

L

|

|

|

|

|

|

|

|

|

|

|

|

|

|

|

|

L

L

EOEWD

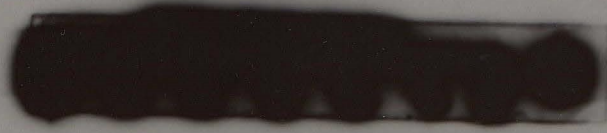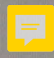

w303/COX6-HAL  
+CAP

aw303Δoxa1/  
COX6-HAL  
+CAP

aw303ΔCOX5/  
COX6-HAL  
+CAP.

┐

┐┐

┐

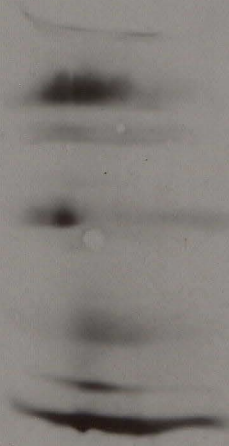

→

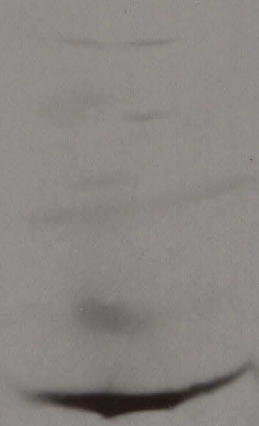

ATP9  
mono.

┐

┐  
┐

┐┐

┐

N/O

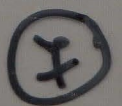

17 w/ filter paper  
08/07/18

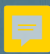

W303

COX6-HAC

COX6-HAC  
ATP9/ST21

1

1

1

1

1

$\alpha$ - $\beta$  subunit

4-13% BN-PAGE

①

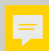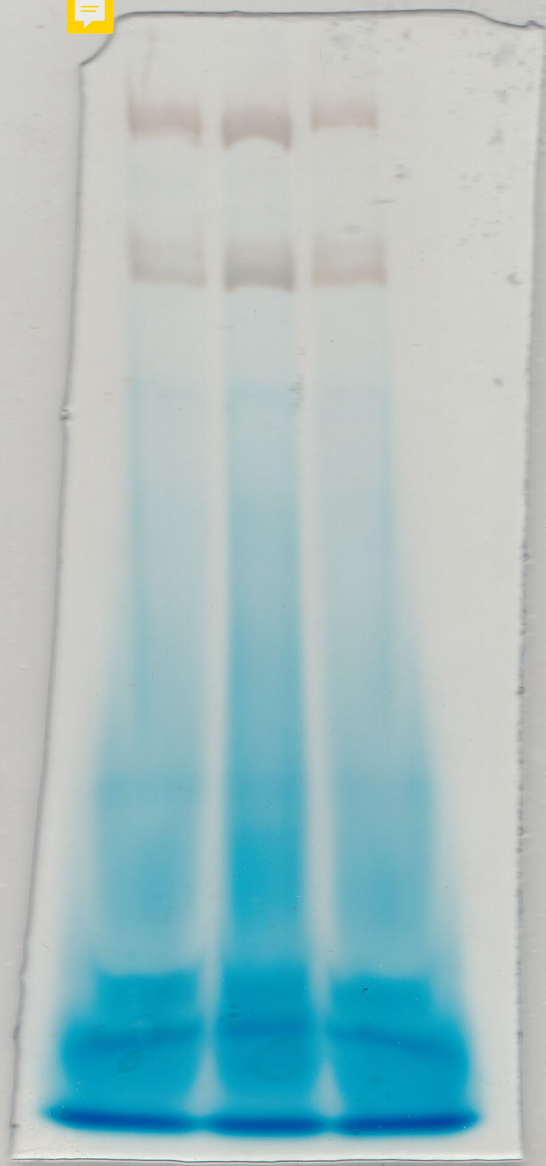



9 Oct 94

12x2D2

(7)

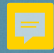

WT  
 WT+TCA  
 WT+CuP  
 WT+CuP+TCA  
 ATP152a1  
 ATP9/152a1+TCA  
 ATP9/152a1+CuP  
 ATP9/152a1+CuP+TCA

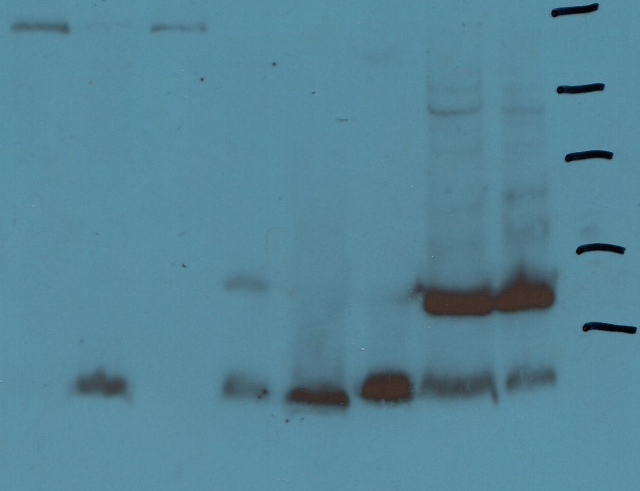

6  
5  
4  
3  
2  
1  
0

kDa

12

S-35 label in 8  
pull-down P-  
beads

07/18/19

2 days

6

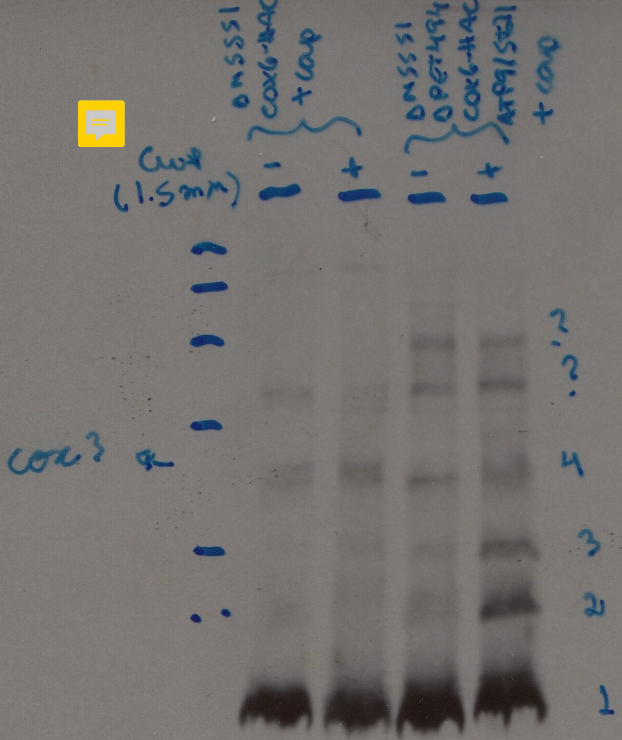

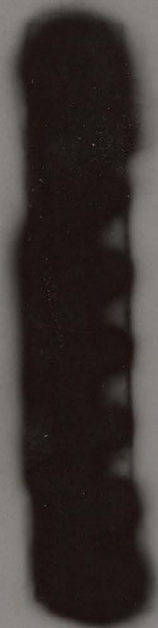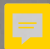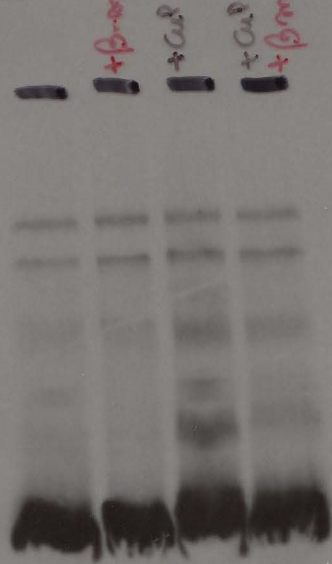

Strain: M5551 / B26TH94 / ATP1/ST21

2 days

06/18/19  
V54.SDS

labeling  
zull down. P-C beads  
crosslink 1h. 3m. M. Cu.P

5
